# Supplementary material
Source: Springer Nature journal article supplement (https://www.springermedizin.de/resource/supplementary/13256_2010_1599_MOESM1_ESM.pdf/9648020)

0.1

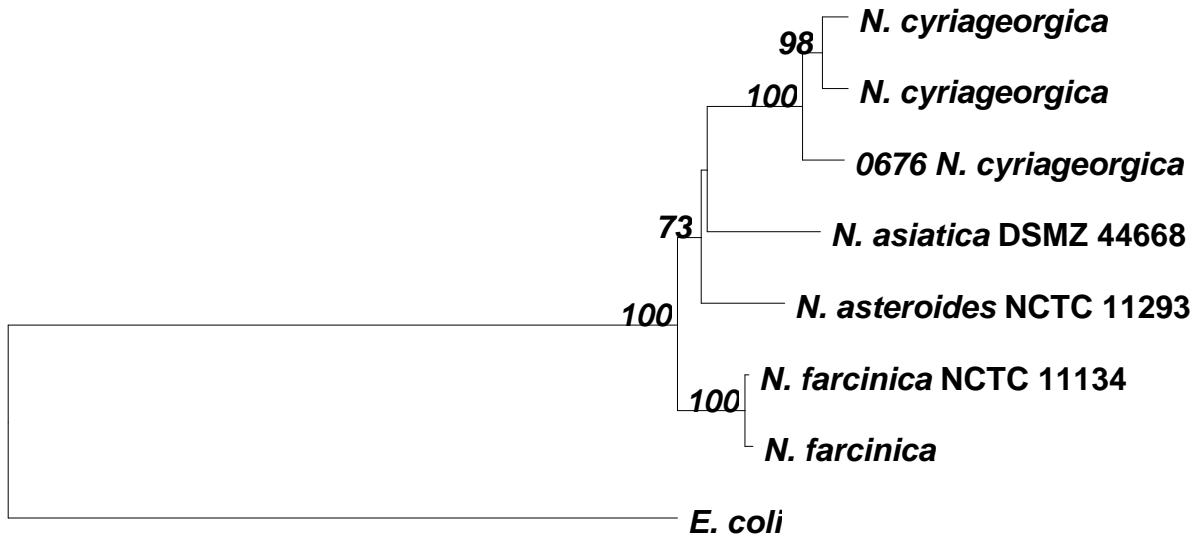

Supplement: MOESM1 [file 9648020]
